# Supplementary material
Source: PubMed Central journal article supplement (PMC3889613)
Supplement: JB.00507-13_zjb999092926so1.pdf [file JB.00507-13_zjb999092926so1.pdf]

# The conserved DNA-binding protein WhiA is involved in cell division in *Bacillus subtilis*

## Supplemental Material

Katarina Surdova, Pamela Gamba, Dennis Claessen, Tjalling Siersma, Martijs J. Jonker, Jeff Errington, Leendert W. Hamoen

### Content:

- Table S1: Bacterial strains and plasmids
- Table S2: Oligonucleotides
- Table S3: Sporulation efficiency
- Fig. S1: Sequence alignment of WhiA-like proteins
- Fig. S2: Growth rates of *yvcL* mutants
- Fig. S3: GFP-YvcL expression levels and localization
- Fig. S4: FtsZ levels in  $\Delta yvcL$  and YvcL overproduction strains
- Fig. S5: Localization of Noc-YFP in *yvcL* mutant cells
- References

Table S1. Bacterial strains and plasmids used in this study.

| <i>B. subtilis</i> | Relevant genotype                                                                                                                                                   | Source & comment                                                         |
|--------------------|---------------------------------------------------------------------------------------------------------------------------------------------------------------------|--------------------------------------------------------------------------|
| 168                | <i>trpC2</i> (0168 ED)                                                                                                                                              | wild-type for this study                                                 |
| 1283               | <i>trpC2</i> $\Delta$ <i>noc::spc</i>                                                                                                                               | (1)                                                                      |
| 1356               | <i>trpC2</i> $\Delta$ <i>zapA-yshB::tet</i>                                                                                                                         | (2)                                                                      |
| 1801               | <i>trpC2</i> chr:: pJSlZDpble ( $P_{spac^-}$ <i>ftsZ ble</i> )                                                                                                      | (3)                                                                      |
| 2020               | <i>trpC2 amyE::</i> ( $P_{xyr^-}$ <i>gfpmut1-ftsZ spc</i> )                                                                                                         | J. Sievers (unpublished)                                                 |
| 3309               | <i>trpC2 minCD::kan</i>                                                                                                                                             | Laboratory stock                                                         |
| 4701               | <i>trpC2 amyE::P<sub>xyr^-</sub>-noc-yfpmut1</i>                                                                                                                    | (4)                                                                      |
| BFA2863            | <i>trpC2</i> $\Delta$ <i>sepF::ery</i> ( <i>pMutin4YImF</i> )                                                                                                       | (5)                                                                      |
| KS6                | <i>trpC2</i> $\Delta$ <i>zapA-yshB::tet</i>                                                                                                                         | 168::chr. DNA 1356                                                       |
| KS44               | <i>trpC2</i> $\Delta$ <i>ezrA::cat</i>                                                                                                                              | D. Claessen, unpublished                                                 |
| KS50               | <i>trpC2</i> $\Delta$ <i>lacA::cat</i> $\Delta$ <i>zapA-yshB::tet</i> pLOSS-zapA                                                                                    | This work                                                                |
| KS162              | <i>trpC2</i> $\Delta$ <i>zapA-yshB::tet</i> $P_{spac^-}$ <i>ftsZ ble</i>                                                                                            | KS6::chr. DNA 1801                                                       |
| KS207              | <i>trpC2</i> $\Delta$ <i>yvcL::pMutin4YvcL</i> ( <i>ery</i> )                                                                                                       | This work                                                                |
| KS267              | <i>trpC2</i> $\Delta$ <i>yvcL::TnYLB-1</i> ( <i>kan</i> )                                                                                                           | This work, transposon disruption                                         |
| KS268              | <i>trpC2 P<sub>spac^-</sub>ftsZ ble</i>                                                                                                                             | 168::chr. DNA 1801                                                       |
| KS338              | <i>trpC2</i> $\Delta$ <i>minCD::kan</i>                                                                                                                             | 168::chr. DNA 3309                                                       |
| KS341              | <i>trpC2</i> $\Delta$ <i>yvcL::TnYLB-1</i> ( <i>kan</i> ) $\Delta$ <i>sepF::ery</i>                                                                                 | KS267::chr. DNA BFA2863                                                  |
| KS344              | <i>trpC2</i> $\Delta$ <i>yvcL::TnYLB-1</i> ( <i>kan</i> ) $\Delta$ <i>ezrA::cat</i>                                                                                 | KS267::chr. DNA KS44                                                     |
| KS345              | <i>trpC2</i> $\Delta$ <i>noc::spc</i>                                                                                                                               | 168::1283                                                                |
| KS354              | <i>trpC2</i> $\Delta$ <i>yvcL::TnYLB-1</i> ( <i>kan</i> ) $\Delta$ <i>noc::spc</i>                                                                                  | KS267::chr. DNA KS345                                                    |
| KS356              | <i>trpC2</i> $\Delta$ <i>yvcL::ery</i> $\Delta$ <i>minCD::kan</i>                                                                                                   | KS207::chr. DNA KS338                                                    |
| KS396              | <i>trpC2 amyE::P<sub>xyr^-</sub>-yvcL spc</i>                                                                                                                       | This work; 168:: pSG1729YvcLAGFP                                         |
| KS400              | <i>trpC2</i> $\Delta$ <i>yvcL::kan</i>                                                                                                                              | This work                                                                |
| KS438              | <i>trpC2 yvcL::P<sub>spac^-</sub>-yvcL ery</i>                                                                                                                      | This work                                                                |
| KS696              | <i>trpC2 yvcL</i>                                                                                                                                                   | This work                                                                |
| KS742              | <i>trpC2</i> $\Delta$ <i>lacA::cat</i> $\Delta$ <i>zapA-yshB::tet</i> $\Delta$ <i>yvcL</i><br>pLOSS-YvcL                                                            | This work; $\Delta$ <i>yvcL</i> originated from KS696                    |
| KS748              | <i>trpC2 yvcL P<sub>spac^-</sub>ftsZ ble</i>                                                                                                                        | KS696::chr. DNA 1801                                                     |
| KS754              | <i>trpC2 yvcL::P<sub>spac^-</sub>-yvcL ery</i> $\Delta$ <i>zapA-yshB::tet</i><br><i>amyE::P<sub>xyr^-</sub>-gfp-ftsZ</i> ( <i>spc</i> ) pMAP65 ( <i>lacI, kan</i> ) | This work, the $P_{xyr^-}$ - <i>gfp-ftsZ</i> fusion originates from 2020 |
| KS859              | <i>trpC2 yvcL::P<sub>spac^-</sub>-yvcL ery</i> $\Delta$ <i>zapA-yshB::tet</i><br><i>aprE::lacI spc</i>                                                              | KS891::chr. DNA KS6                                                      |
| KS891              | <i>trpC2 yvcL::P<sub>spac^-</sub>-yvcL ery</i> <i>aprE::lacI spc</i>                                                                                                | KS438::pAPNC213                                                          |
| KS902              | <i>trpC2 gtaB::TnYLB-1 kan</i> $\Delta$ <i>yvcL::ery</i>                                                                                                            | This work                                                                |
| KS903              | <i>trpC2 pgcA::TnYLB-1 kan</i> $\Delta$ <i>yvcL::ery</i>                                                                                                            | This work                                                                |
| KS1015             | <i>trpC2</i> $\Delta$ <i>yvcL::ery</i> $\Delta$ <i>ugtP::neo</i>                                                                                                    | KS207::chr. DNA PG237, this work                                         |
| PG8                | <i>trpC2 amyE::P<sub>xyr^-</sub>-ftsZ cat</i>                                                                                                                       | 168::chr. DNA YK059                                                      |
| PG237              | <i>trpC2</i> $\Delta$ <i>ugtP::neo</i>                                                                                                                              | Pamela Gamba, unpublished                                                |
| PG725              | <i>trpC2 amyE::P<sub>xyr^-</sub>-noc-yfpmut1</i>                                                                                                                    | 168::4701                                                                |
| PG727              | <i>trpC2 amyE::P<sub>xyr^-</sub>-noc-yfpmut1</i> $\Delta$ <i>yvcL::kan</i>                                                                                          | KS400::4701                                                              |
| PG732              | <i>trpC2 amyE::P<sub>xyr^-</sub>-mgfpmut1-yvcL spc</i>                                                                                                              | 168::pSG1729YvcL(mGFP), this work                                        |
| PG735              | <i>trpC2 amyE::P<sub>xyr^-</sub>-ftsZ cat</i> $\Delta$ <i>zapA-yshB::tet</i>                                                                                        | PG8::chr. DNA KS6                                                        |
| PG736              | <i>trpC2</i> $\Delta$ <i>yvcL::kan</i> <i>amyE::P<sub>xyr^-</sub>-mgfpmut1-yvcL</i><br><i>spc</i>                                                                   | KS400::chr. DNA PG732                                                    |
| PG737              | <i>trpC2 amyE::P<sub>xyr^-</sub>-ftsZ cat</i> $\Delta$ <i>yvcL::kan</i>                                                                                             | PG8::chr. DNA KS400                                                      |
| PG738              | <i>trpC2 amyE::P<sub>xyr^-</sub>-ftsZ cat</i> $\Delta$ <i>zapA-yshB::tet</i><br>$\Delta$ <i>yvcL::kan</i>                                                           | PG735::chr. DNA KS400                                                    |
| PG739              | <i>trpC2</i> $\Delta$ <i>zapA-yshB::tet</i> $\Delta$ <i>noc::spc</i>                                                                                                | KS6::KS345                                                               |
| PG740              | <i>trpC2</i> $\Delta$ <i>zapA-yshB::tet</i> $\Delta$ <i>minCD::kan</i>                                                                                              | KS6::KS338                                                               |
| YK059              | CRK6000 <i>amyE::P<sub>xyr^-</sub>-ftsZ cat</i>                                                                                                                     | (6)                                                                      |

  

| <i>E. coli</i> | Relevant genotype                                                                                                  | Source & comment |
|----------------|--------------------------------------------------------------------------------------------------------------------|------------------|
| XL1Blue        | <i>recA1 endA1 gyrA96 thi1 hsdR17 supE44 relA1</i><br><i>lac</i> [F' <i>proA+B+lacIq</i> $\Delta$ M15 Tn10 (TetR)] | Stratagene       |
| KS432          | XL1Blue::pQE60EYvcL                                                                                                | This work        |

  

| Plasmid    | Relevant genotype/comment                                                                                       | Source & comment       |
|------------|-----------------------------------------------------------------------------------------------------------------|------------------------|
| pAPNC213   | <i>bla aprE5' spc lacI P<sub>spac^-</sub>-mcs aprE3'</i>                                                        | (7)                    |
| pBEST501   | bearing the kanamycin cassette                                                                                  | (8)                    |
| pQE60E     | derived from pQE60 (Qiagen), expression<br>vector for C-terminal His-6 fusions                                  | L. Hamoen, unpublished |
| pQE60EYvcL | pQE60E containing <i>yvcL-his6</i>                                                                              | This work              |
| pLOSS*     | <i>bla spc P<sub>spac^-</sub>-mcs P<sub>divIVA</sub>-lacZ lacI rep<sub>pLS20</sub></i><br>(GA $\rightarrow$ CC) | (9)                    |
| pLOSS-zapA | pLOSS* containing <i>zapA-yshB</i>                                                                              | This work              |
| pLOSS-YvcL | pLOSS* containing <i>yvcL</i>                                                                                   | This work              |
| pMAP65     | pUB110 $P_{pen^-}$ - <i>lacI</i>                                                                                | (10)                   |
| pMarB      | <i>bla erm P<sub>ctc</sub>-Himar1 kan</i> (TnYLB-1)                                                             | (11)                   |

---

|                   |                                                                               |            |
|-------------------|-------------------------------------------------------------------------------|------------|
| pMutin4           | <i>bla erm lacZ lacI</i>                                                      | (12)       |
| pMutin4YvcL       | integrates into <i>yvcL</i> gene                                              | This work  |
| pMutin4YvcLKO     | pMutin4 containing 3' fragment of <i>yvcK</i> and 5' fragment of <i>yvcL</i>  | This work  |
| pMut4YKO          | pMutin4YvcLKO introducing a stop codon and <i>EcoRI</i> site into <i>yvcL</i> | This work. |
| pMutYvcL          | used for construction of an <i>yvcL-crh-yvcN</i> conditional mutant           | This work  |
| pSG1729           | <i>bla amyE3' spc P<sub>xyr</sub>-gfpmut1' amyE5'</i>                         | (13)       |
| pSG1729YvcL       | <i>bla amyE3' spc P<sub>xyr</sub>-gfpmut1-yvcL amyE5'</i>                     | This work  |
| pSG1729YvcL(mGFP) | <i>bla amyE3' spc P<sub>xyr</sub>-mgfpmut1-yvcL amyE5'</i>                    | This work  |
| pSG1729YvcLΔGFP   | <i>bla amyE3' spc P<sub>xyr</sub>-yvcL amyE5'</i>                             | This work  |

---

Table S2. Oligonucleotides used in this study.

| Name            | Restriction site | Sequence (5'-3')                        | Reference/ used for                            |
|-----------------|------------------|-----------------------------------------|------------------------------------------------|
| HS410           |                  | CCTGTCCACACAATCTAAACTTTTCGAAAGATCC<br>C | A206K mutation in GFP coding sequence          |
| HS411           |                  | GGGATCTTTTCGAAAGTTTAGATTGTGTGGACAG<br>G | A206K mutation in GFP coding sequence          |
| km3             | <i>Bam</i> HI    | GGGGGATCCAAGACGAAGAGGATGAAG             | <i>kan</i> <sup>R</sup> amplification          |
| km4             | <i>Eco</i> RI    | CCCGAATTCAGAGTATGGACAGTTGCG             | <i>kan</i> <sup>R</sup> amplification          |
| KS80            | -                | GTACAGGTCTTTCTGTATTG                    | KS400 construction                             |
| KS83            | -                | GGCGCTCTGACATGACCATC                    | KS400 construction                             |
| KS84            | <i>Eco</i> RI    | CGGACAGAATTCACCGTCACTTTAAAATAAC         | KS400 construction                             |
| KS89            | <i>Bam</i> HI    | TGAGGTGGATCCATGTCATTTGCATCAGAAA         | pQE60E construction                            |
| KS94            | <i>Hind</i> III  | GCTAAGCTTGCATTTCCCAATTTGCTC             | pMut <sub>i</sub> YvcL construction            |
| KS95            | <i>Bam</i> HI    | GATGGATCCCTCATTTCAAGGCTTCATTC           | pMut <sub>i</sub> YvcL, KS400 construction     |
| KS97            | <i>Bam</i> HI    | GATGGATCCTTACGGTTATTTTAAAGTG            | pMut <sub>i</sub> Crh, pLOSS-YvcL construction |
| KS98            | <i>Xho</i> I     | GATCCTCGAGTAAAGTGACGGTTTGCCCTG          | pSG1729YvcLΔGFP construction                   |
| KS99            | <i>Bgl</i> II    | GATCAGATCTTAAAGTGACGGTTTGCCCTG          | pQE60E construction                            |
| KS120           |                  | AATTCTGATAACTGGAAGTGAAGGACTG            | pMut4YKO construction                          |
| KS121           |                  | CCAGTTATCAGAATTTCTTTTTTTGTTTCTGATG      | pMut4YKO construction                          |
| KS128           | <i>No</i> cI     | ACTGAAAGCGGCCGCCCTTGAAATGAGGTGGC        | pLOSS-YvcL construction                        |
| KS185           |                  | AATGGAGACTGGATTGCTGTAG                  | <i>xynD</i> qPCR                               |
| KS186           |                  | TTACCGTCTGCACTGTCGAG                    | <i>xynD</i> qPCR                               |
| KS187           |                  | ATACGCGCAGCATCTTAACG                    | <i>ynfF</i> qPCR                               |
| KS188           |                  | GTATTTCTTGCGGCTCCAC                     | <i>ynfF</i> qPCR                               |
| KS198           |                  | TCTGAGCCAGAACCTGATCC                    | <i>spoVID</i> qPCR                             |
| KS199           |                  | AGTCTCCGCTGGAGAGTCTG                    | <i>spoVID</i> qPCR                             |
| KS200           |                  | GATACTAAATCCGCCGGAAC                    | <i>acoC</i> qPCR                               |
| KS201           |                  | TCAAATGTCAGGCTGAGTGG                    | <i>acoC</i> qPCR                               |
| OIPCR1          |                  | GCTTGATAAATTCTATCATAATTG                | (11)                                           |
| OIPCR2          |                  | AGGGAATCATTGAAGGTTGG                    | (11)                                           |
| OIPCR3          |                  | GCATTTAATACTAGCGACGCC                   | (11)                                           |
| STG101          |                  | ATACCGCGGAGATACCGAG                     | <i>scpB</i> Fw qPCR                            |
| STG102          |                  | TTTGACGGCACTTCAATCAG                    | <i>scpB</i> Rw qPCR                            |
| STG410          |                  | TTGACGACAAGCGTGAAAAG                    | <i>rplC</i> Fw qPCR                            |
| STG411          |                  | TTcatACGcatCcatTTCCA                    | <i>rplC</i> Rw qPCR                            |
| <i>yshA</i> -F  | <i>No</i> cI     | GATGCGGCCGCCACTTTTTCGCTGTATATACC        | pLOSS-ZapA construction                        |
| <i>yshB</i> -R  | <i>Bam</i> HI    | GATGGATCCGACGTTACATATGTTCCATC           | pLOSS-ZapA construction                        |
| <i>yvcL</i> -C5 | <i>Kpn</i> I     | GCCTTGGGTACCGGTGGCTATATGTCATTTG         | pSG1729YvcLΔGFP construction                   |
| <i>yvcL</i> -F1 | <i>Hind</i> III  | GCTAAGCTTAAACCGCCATCTCGTACTC            | pMut <sub>i</sub> 4YvcL construction           |
| <i>yvcL</i> -R1 | <i>Bam</i> HI    | GATGGATCCAATTGACGAGGCGGTTGACC           | pMut <sub>i</sub> 4YvcL construction           |
| <i>yvcL</i> -N5 | <i>Hind</i> III  | GCCTTGAAGCTTGGTGGCTATATGTCATTTG         | pSG1729YvcL construction                       |
| <i>yvcL</i> -N3 | <i>Eco</i> RI    | GAACCTGAATTCTCTGTTGAACCATAAAGATC        | pSG1729YvcL construction                       |

Table S3. Sporulation efficiency.

| <b>Strain</b> | <b>Genotype</b>    | <b>Total cell count</b> | <b># Phase bright spores</b> | <b>% Sporulation</b> |
|---------------|--------------------|-------------------------|------------------------------|----------------------|
| 168           | wild type          | 2997                    | 1988                         | 66.3                 |
| KS207         | $\Delta yvcL::ery$ | 2536                    | 1233                         | 48.6                 |
| KS696         | $\Delta yvcL$      | 1933                    | 808                          | 41.8                 |

The sporulation efficiencies are calculated from the number of phase bright spores relative to the total number of cells. Cultures were grown in DSM medium for 24 hours at 37°C (two biological and two technical replicates). Spore and cell numbers were determined by light microscopy.

```

Bacsu/1-316  1  -----MSFASETKKELTNLEVKDCCI -NAELSALIRMNGALSFTNRHLVLDVQTENAAIARRIYTLIK 62
Staac/1-314  1  -----MSFASEMKNELTRIDVDEMNA-KAELSALIRMNGALSLSNQQFVINVTENATTARRIYSLIK 62
Strp2/1-303  1  -----MSFTVAVKEEILG---QHHL-SWHELSAIIKMSGSIGLSTSGLTLSVVVTENAKLARHLYESFL 59
Strco/1-328  1  -----MTAAVKSEISQLPVTRTCCRKAEVSAVLRFAAGLHLVSGRIVIEAELDTGNAARRLKRDI 61
Myctu/1-325  1  -----MTTDVKDEL SRLVVKSVSARRA EVTSLLRFAAGLHIVGGRVVVEAELDLGSIARRLRKEIF 61
Thema/1-295  1  MVSLLRRTFSEEIK EELVNVVFGSREEVISELLGFIKARGLDVKSRHIVFSLHSFAAS--RRLNLMK 67

Bacsu/1-316  63  KQYDVSVLELVRKKMRLKKNNVYIVRFSENAKALEDLKILGENFVFRSISKELVK-KRCKRSYMRG 130
Staac/1-314  63  RVFNVEVELVRKKMKLKNNIYICRTKMKAKELDELGILKD-GIFTHEIDHSMIQ-DDEMRRSYLRG 129
Strp2/1-303  60  HFYEIKSEIRHHQSRNLKKNRVYTVFTDEKVVQDLSDLHLADSFVLEGTIDEAII-S-DEEAGRAYLCG 127
Strco/1-328  62  EIFGHSSLEIVMAPGGRRGSRFVVRVAVGGDQAROTGLVDGRGRPIRGLPPQVVSATCDAAEAARWG 130
Myctu/1-325  62  ELVGYTAVVHVLASGIRKSTRYVLRVANDGEALAROTGLLDMRGRPVRLPAQVVGGSIDDAEAARWG 130
Thema/1-295  68  YLSKPVSEIIVEKSHNKKRYIKITA EYSESFMIPEPFDVALFVDFLR-----G 117

Bacsu/1-316  131  AFLAGGSVNNPETSSYHLEIFSLYKEHNDSLCDLLNEFQINSKTLERKKGYITYLKEAEKITEFNVIG 199
Staac/1-314  130  AFLAGGSVNNPETSSYHLEIFSQNESHAEGTLKLMNSYENAKHLERKKGSI TYLKEAEKISDFLSLIG 198
Strp2/1-303  128  AFLANGSIRDPESGKYQLEISSVYLDHAQGIASLLQOFLDAKVLERKKGAVTYLQRAEDIMDFLIVIG 196
Strco/1-328  131  AFLAHGSLTEPGRS-SSLEVTCPGPEAALALVGAARRLSIPAKARVVRGVDVVVRDGDAGALLTRLG 198
Myctu/1-325  131  AFLAHGSLTEPGRS-SALEVSCPGPEAALALVGAARRLGVGAKARVVRGADR VVVRDGEAGALLTRMG 198
Thema/1-295  118  LFLSGSSMTNRYHYHLEINLFEETLALTRKSLKDFFINAGIILRNTRKLYIKSIDLVLEAIG 186

Bacsu/1-316  200  AHNSLLRFEDVRIVRDMRNSVNRLVNCETANLNKTI GASLRQVENIKYIDERIGLEALFEKLRREI AQLR 268
Staac/1-314  199  GYQALLKFEDVRIVRDMRNSVNRLVNCETANLNKTVSAAMKQVESIKLIDKEIGIENLPDRLREIARIR 267
Strp2/1-303  197  AMQARDDFERVKILRETRNDLNRANNAETANIARTVSAMKTIINISKIKDIMGLENLPDLQEV AQLR 265
Strco/1-328  199  AHDSVLAWEEERLREVRATANRLANFDDANLRRSARAAVAAGARVQRALEILADD-VPEHLAAAGRLR 266
Myctu/1-325  199  AQDTRLVWEERLREVRATANRLANFDDANLRRSARAAVAAGARVQRALEILGDT-VPEHLASAGKLR 266
Thema/1-295  187  VQRKLEEIDRIVTEKVI GDNRTVNFIEANAIRTANSTARQIRAI ELIKENMGLENLPDLRRVALVR 255

Bacsu/1-316  269  IDYQEVTLKELGEMVASGKISKSGINHRLRKLDEIAEQLRTGQTVTLK----- 316
Staac/1-314  268  VEHQEISLKELGEMVSTGPI SKSGVNHRLRKLNDLADKIRNGEQIEL----- 314
Strp2/1-303  266  IQHPDYSIQQLADSLST-PLTKSGVNHRLRKLINKI ADEL----- 303
Strco/1-328  267  MEHKQASLEELGALADP-PLTKDAVAGRI RRLLAMADKRASDLGIAGTDANLGEEELADNLVG 328
Myctu/1-325  267  VEHRQASLEELGRLADP-PMTKD AVAGRI RRLLSMADRKAKVDGIPDTESVVT PDLLEDA--- 325
Thema/1-295  256  LRNKELSLRELGKKNL---TKSQIYSKLRKI KIIAERFGDVK----- 295

```

Fig. S1. Sequence alignment of WhiA-like proteins. The protein sequences were aligned using ClustalW and the alignment was coloured using JalView programme (14). WhiA-like proteins from the following organisms were aligned: (*Bacsu*) *Bacillus subtilis*, (*Staac*) *Staphylococcus aureus*, (*Strp2*) *Streptococcus pneumoniae*; (*Strco*) *Streptomyces coelicolor*; (*Myctu*) *Mycobacterium tuberculosis*, and (*Thema*) *Thermotoga maritima*. Conserved residues are coloured, with the least variable conserved residues in red background.

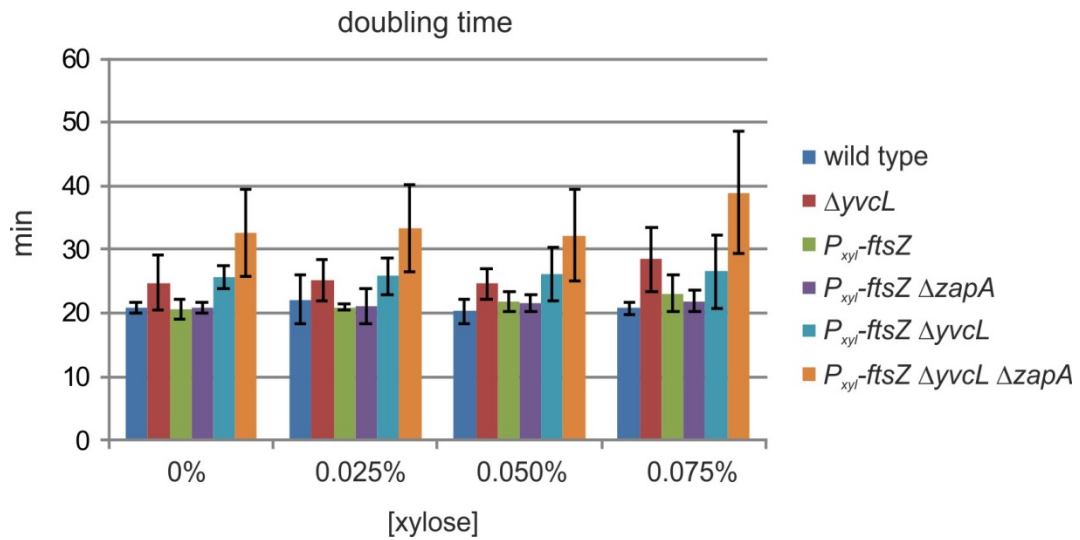

Fig. S2. Growth rates of *yvcL* mutants. Cells of strains: 168 (wild type), KS400 ( $\Delta yvcL$ ), PG8 ( $P_{xyl-ftsZ}$ ), PG735 ( $P_{xyl-ftsZ} \Delta zapA$ ), PG737 ( $P_{xyl-ftsZ} \Delta yvcL$ ), and PG738 ( $P_{xyl-ftsZ} \Delta zapA \Delta yvcL$ ) were initially grown in LB medium with 0.05% xylose, then diluted and grown in LB medium supplemented with increasing concentrations of xylose at 37°C in a plate reader. The doubling times and standard deviations were calculated from three independent experiments.

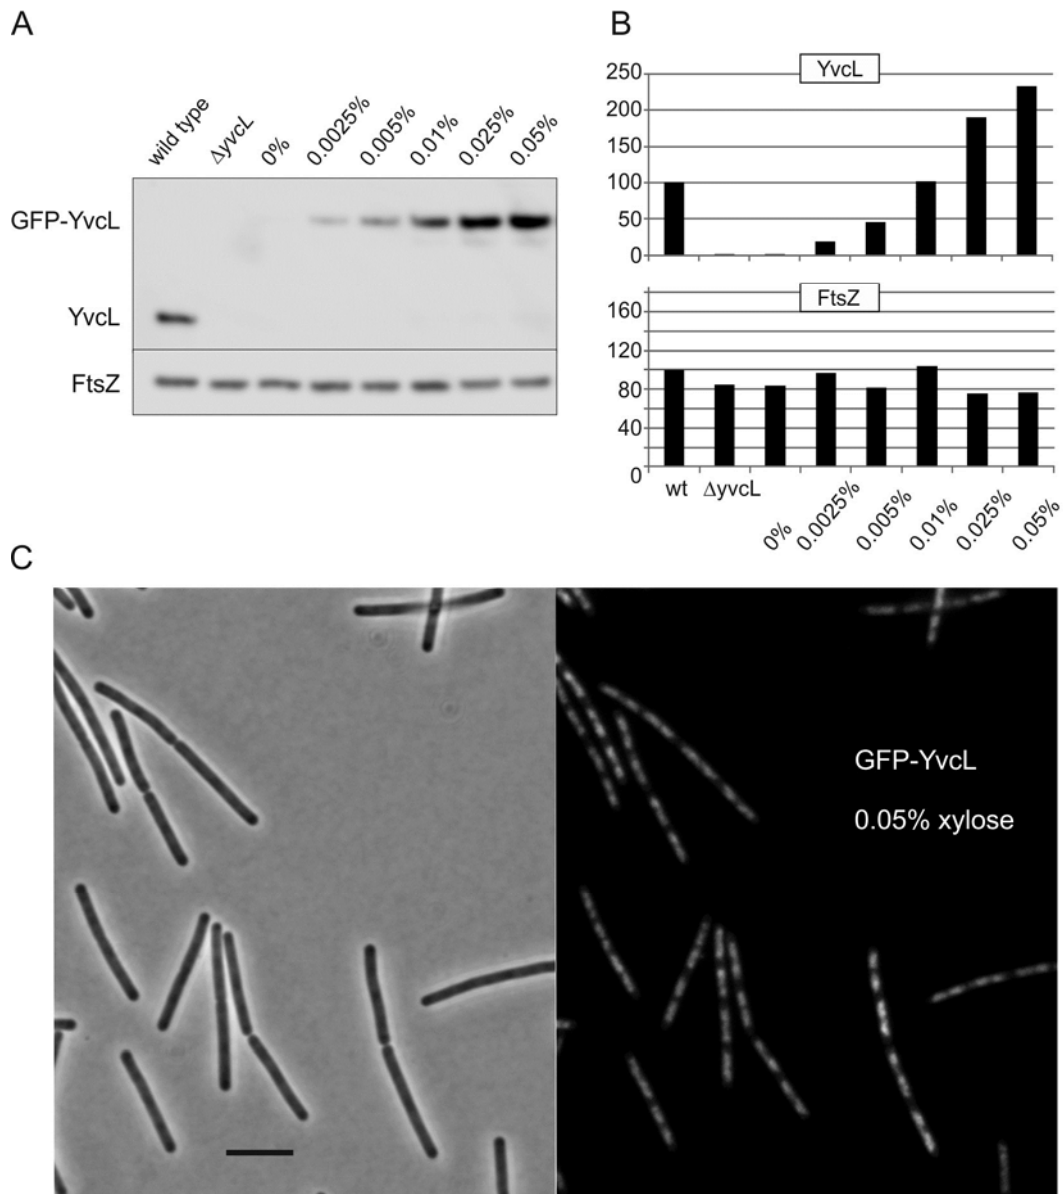

Fig. S3. GFP-YvcL expression levels and localization. (A) Western blot analysis using YvcL antibodies to determine cellular YvcL and GFP-YvcL levels. Strains 168 (wild type),  $\Delta yvcL$ , and PG736 ( $P_{xyI}$ -*mgfp-yvcL*) were grown in LB medium at 30°C. In case of PG736, different concentrations of xylose were added (0% up to 0.05%). FtsZ immunodetection was used as internal control. (B) Band intensities (arbitrary units) of the Western blot in (A). (C) Fluorescence microscopy image of strain PG736 grown in LB medium supplemented with 0.05% xylose at 30°C. Scale bar 5  $\mu$ m.



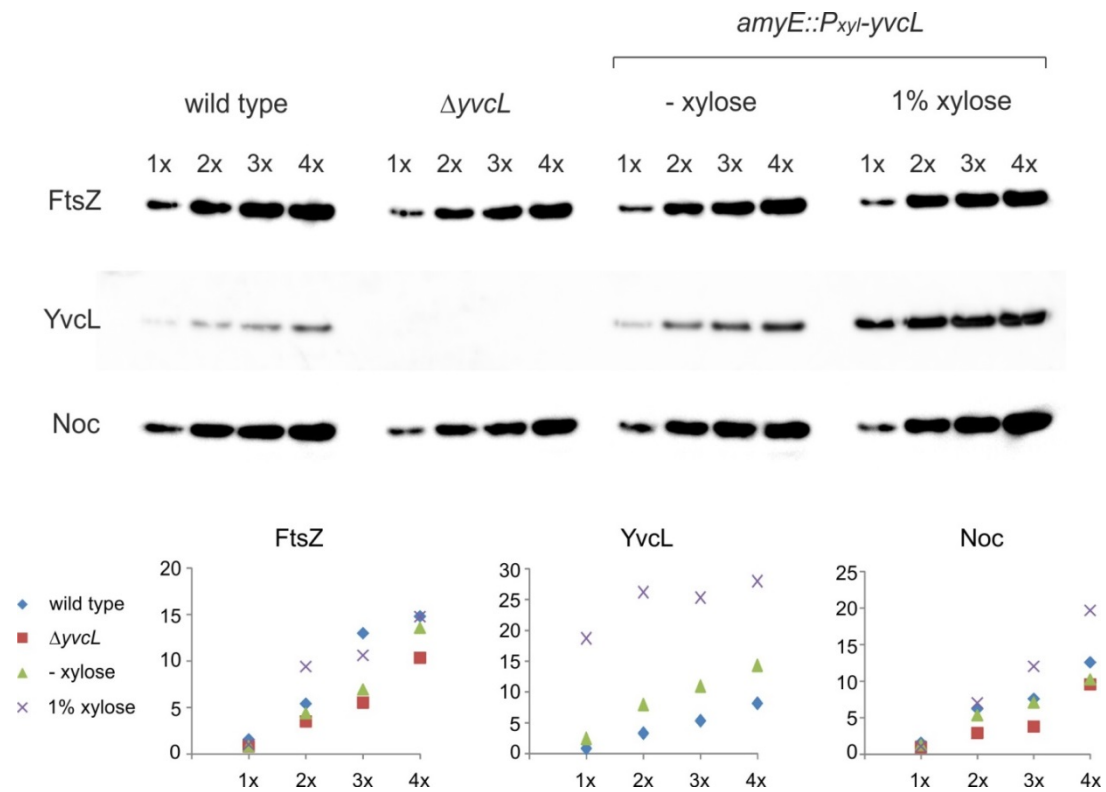

Fig. S4. FtsZ levels in  $\Delta yvcL$  and YvcL-overproduction strains. Western blots indicating FtsZ, YvcL and Noc levels in wild type, *yvcL* mutant strain, and a strain overexpressing YvcL are shown. Samples were diluted (1 to 4 fold) before loading onto the protein gel to facilitate quantification. Graphs presenting the intensities (arbitrary units) of the protein bands are shown below. Strains 168 (wild type), KS400 ( $\Delta yvcL$ ), and KS396 (*P<sub>xyI</sub>-yvcL*) were grown to  $OD_{600} \sim 0.4$  in LB medium at 37°C. Protein concentrations of cell extracts were measured by Bradford protein assay, and immunodetection of Noc was used as internal control.

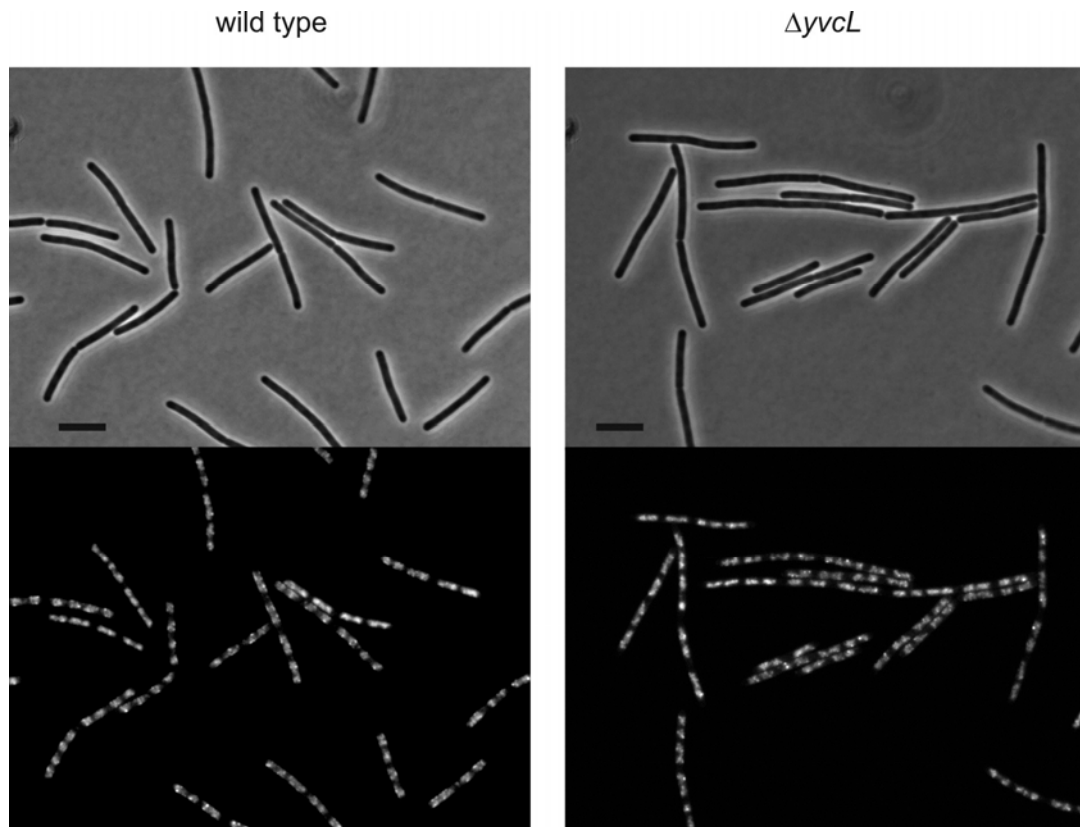

Fig. S5. Localization of Noc-YFP in *yvcL* mutant cells. For fluorescence microscopy, strains PG725 ( $P_{xyI}$ -*noc-yfp*) and PG727 ( $P_{xyI}$ -*noc-yfp*  $\Delta yvcL$ ) were grown in LB medium at 30°C, supplemented with 0.5% xylose to express Noc-YFP. Scale bar 5  $\mu\text{m}$ .

## REFERENCES

1. **Wu, L. J., and J. Errington.** 2004. Coordination of cell division and chromosome segregation by a nucleoid occlusion protein in *Bacillus subtilis*. *Cell* **117**:915-925.
2. **Feucht, A., and J. Errington.** 2005. *ftsZ* mutations affecting cell division frequency, placement and morphology in *Bacillus subtilis*. *Microbiology* **151**:2053-2064.
3. **Marston, A. L., H. B. Thomaides, D. H. Edwards, M. E. Sharpe, and J. Errington.** 1998. Polar localization of the MinD protein of *Bacillus subtilis* and its role in selection of the mid-cell division site. *Genes & development* **12**:3419-3430.
4. **Wu, L. J., S. Ishikawa, Y. Kawai, T. Oshima, N. Ogasawara, and J. Errington.** 2009. Noc protein binds to specific DNA sequences to coordinate cell division with chromosome segregation. *EMBO J* **28**:1940-1952.
5. **Hamoen, L. W., J. C. Meile, W. de Jong, P. Noirot, and J. Errington.** 2006. SepF, a novel FtsZ-interacting protein required for a late step in cell division. *Mol Microbiol* **59**:989-999.
6. **Kawai, Y., and N. Ogasawara.** 2006. *Bacillus subtilis* EzrA and FtsL synergistically regulate FtsZ ring dynamics during cell division. *Microbiology* **152**:1129-1141.
7. **Morimoto, T., P. C. Loh, T. Hirai, K. Asai, K. Kobayashi, S. Moriya, and N. Ogasawara.** 2002. Six GTP-binding proteins of the Era/Obg family are essential for cell growth in *Bacillus subtilis*. *Microbiology* **148**:3539-3552.
8. **Itaya, M., K. Kondo, and T. Tanaka.** 1989. A neomycin resistance gene cassette selectable in a single copy state in the *Bacillus subtilis* chromosome. *Nucleic Acids Res* **17**:4410.
9. **Claessen, D., R. Emmins, L. W. Hamoen, R. A. Daniel, J. Errington, and D. H. Edwards.** 2008. Control of the cell elongation-division cycle by shuttling of PBP1 protein in *Bacillus subtilis*. *Mol Microbiol* **68**:1029-1046.
10. **Petit, M. A., E. Dervyn, M. Rose, K. D. Entian, S. McGovern, S. D. Ehrlich, and C. Bruand.** 1998. PcrA is an essential DNA helicase of *Bacillus subtilis* fulfilling functions both in repair and rolling-circle replication. *Mol Microbiol* **29**:261-273.
11. **Le Breton, Y., N. P. Mohapatra, and W. G. Haldenwang.** 2006. In vivo random mutagenesis of *Bacillus subtilis* by use of TnYLB-1, a mariner-based transposon. *Appl Environ Microbiol* **72**:327-333.
12. **Vagner, V., E. Dervyn, and S. D. Ehrlich.** 1998. A vector for systematic gene inactivation in *Bacillus subtilis*. *Microbiology* **144 ( Pt 11)**:3097-3104.
13. **Lewis, P. J., and A. L. Marston.** 1999. GFP vectors for controlled expression and dual labelling of protein fusions in *Bacillus subtilis*. *Gene* **227**:101-110.
14. **Waterhouse, A. M., J. B. Procter, D. M. Martin, M. Clamp, and G. J. Barton.** 2009. Jalview Version 2--a multiple sequence alignment editor and analysis workbench. *Bioinformatics* **25**:1189-1191.
